# Supplementary material for: Oxygen vacancy modulation of nanolayer TiOx to improve hole-selective passivating contacts for crystalline silicon solar cells
Source: Royal Society of Chemistry journal article supplement (doi:10.1039/d4ta05538a), 2024-01-01
Supplement: d4ta05538a1.pdf [file d4ta05538a1.pdf]

## Supplementary Information

### Oxygen vacancy modulation of nanolayer $\text{TiO}_x$ to improve hole-selective passivating contacts for crystalline silicon solar cells

Yanhao Wang,<sup>a,c,f</sup> Zhaoyang Guo,<sup>a,f</sup> Yongchang Li,<sup>b</sup> Lachlan E. Black,<sup>c\*</sup> Daniel H. Macdonald,<sup>c</sup> Shaojuan Bao,<sup>d</sup> Jilei Wang,<sup>d</sup> Yongzhe Zhang,<sup>e</sup> Shan-Ting Zhang<sup>b\*</sup> and Dongdong Li<sup>a,b\*</sup>

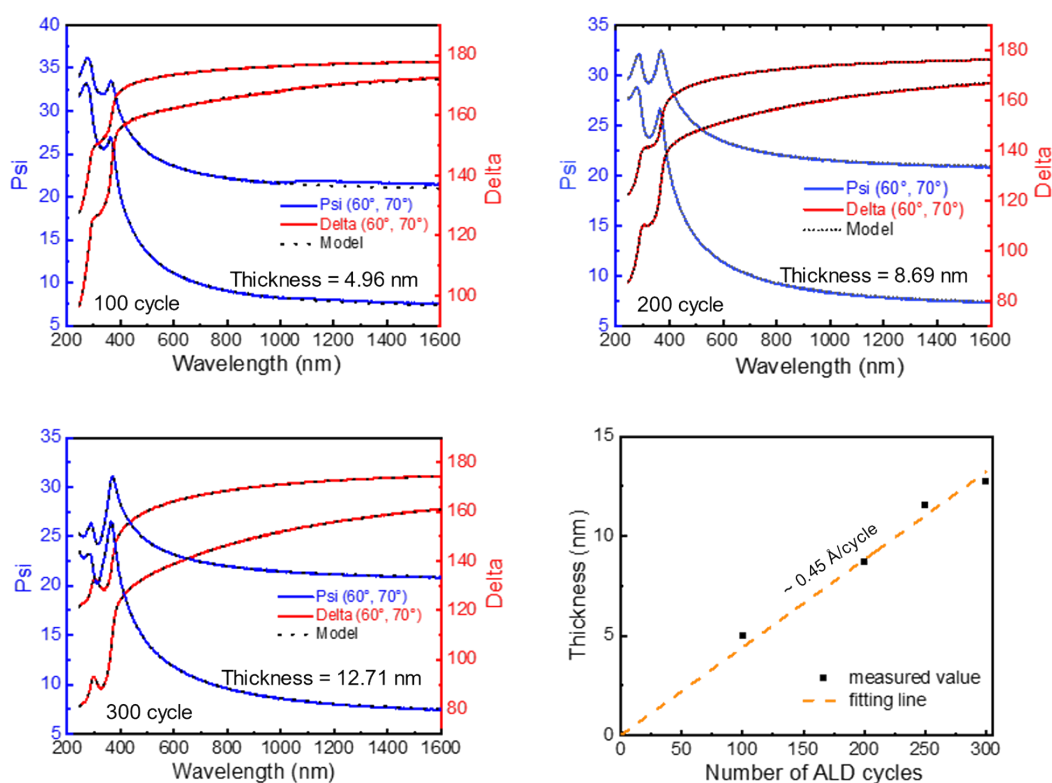

Fig. S1. The spectroscopic ellipsometry of  $\text{TiO}_x$  film with different ALD cycles and the extracted  $\text{TiO}_x$  thickness as a function of the number of ALD cycles.

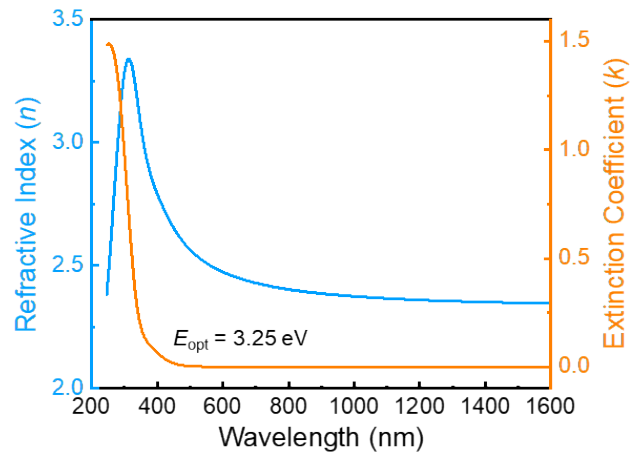

Fig. S2. Refractive index ( $n$ ) and extinction coefficient ( $k$ ) of the  $\text{TiO}_x$  film.

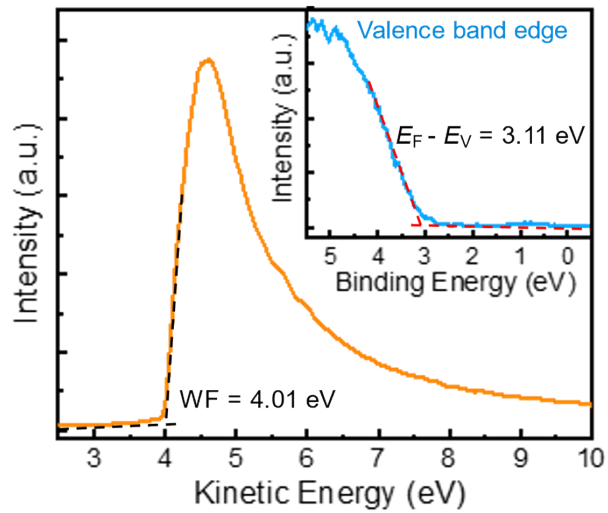

Fig. S3. Secondary electron cut-off and valence band spectra of as-deposited 15-nm  $\text{TiO}_x$  film.

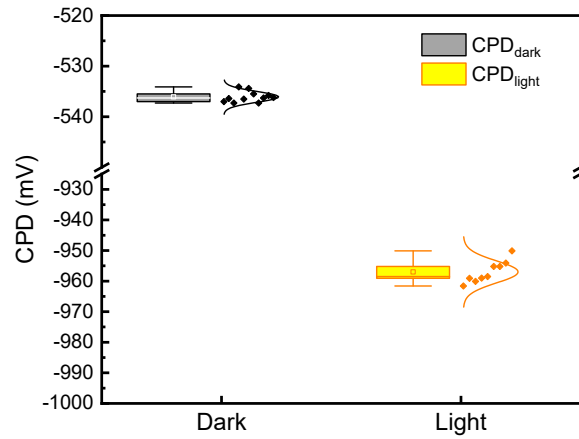

Fig. S4. Contact potential difference (CPD) measured in the dark and under illumination of  $\text{Al}_2\text{O}_3$  film.

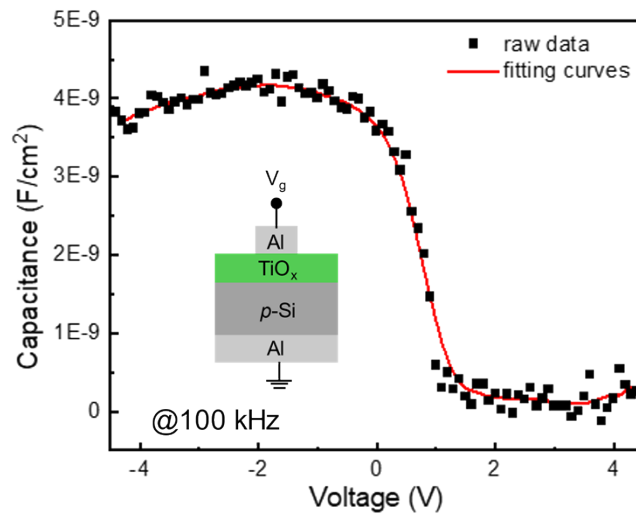

Fig. S5. The  $C$ - $V$  measurement of the  $\text{TiO}_x$  film.

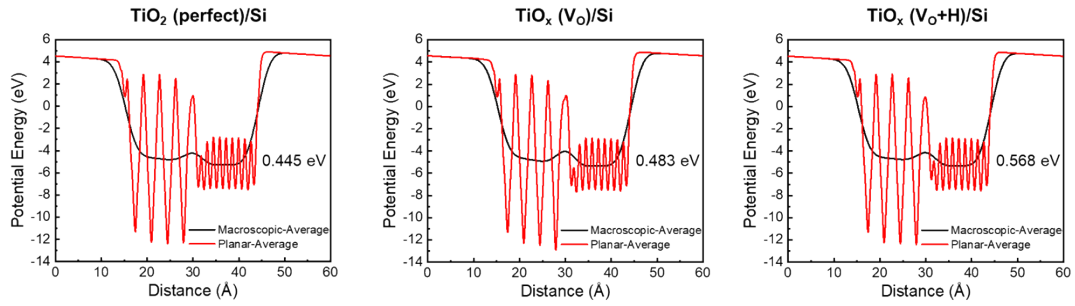

Fig. S6. The simulated macroscopic average and planar average of potential energy for the Si/TiO<sub>2</sub> (perfect), Si/TiO<sub>x</sub> (V<sub>O</sub>), and Si/TiO<sub>x</sub> (V<sub>O</sub>+H) structures, respectively.

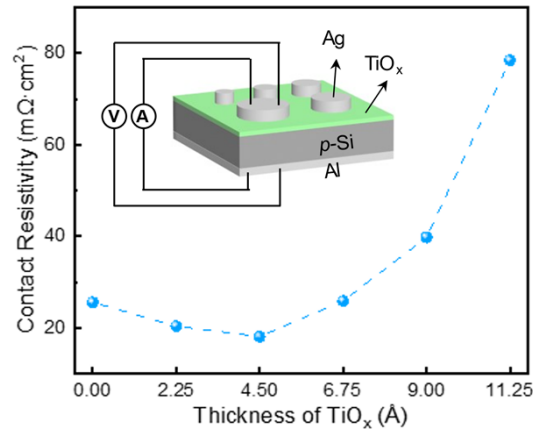

Fig. S7. Contact resistivity of *p*-Si samples with different TiO<sub>x</sub> thicknesses.

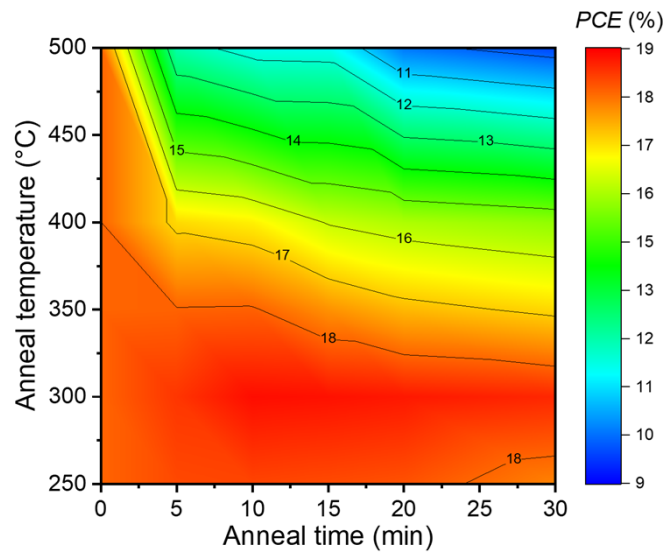

Fig. S8. *PCE* of solar cells as a function of forming gas annealing time and temperature.

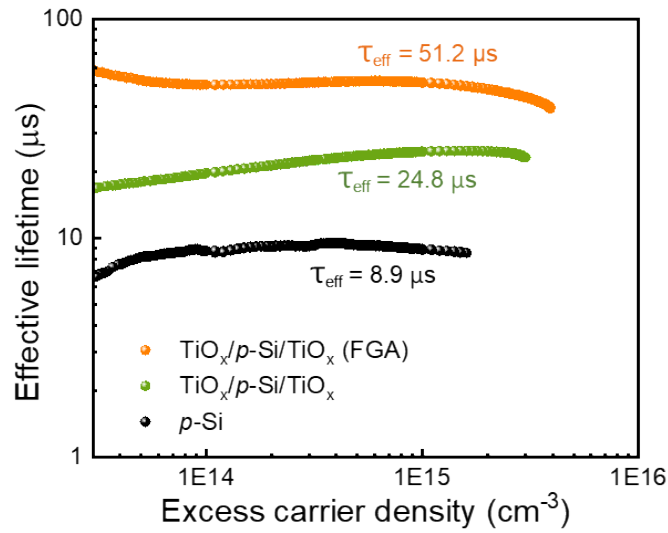

Fig. S9. Effective lifetime of the  $p$ -Si,  $\text{TiO}_x/p\text{-Si}/\text{TiO}_x$ , and  $\text{TiO}_x/p\text{-Si}/\text{TiO}_x$  with FGA, where the  $\tau_{\text{eff}}$  is indicated for excess carrier density of  $1 \times 10^{15} \text{ cm}^{-3}$ .

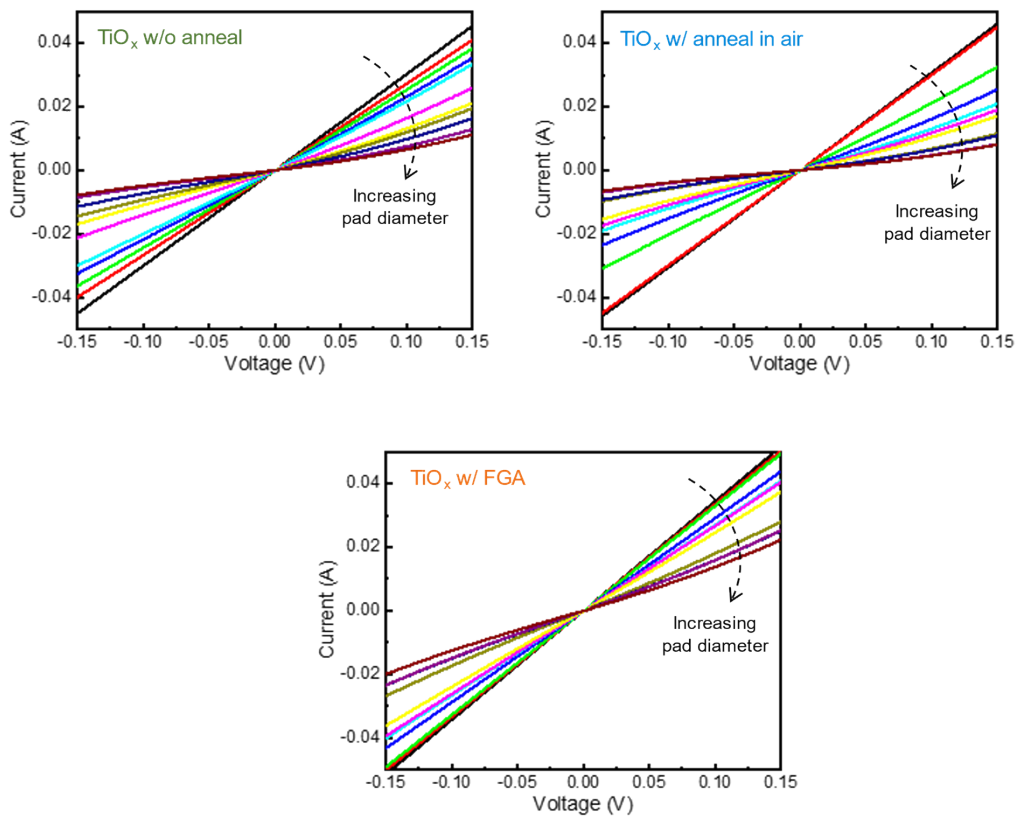

Fig. S10. The photograph of devices with different electrode pads and dark  $I$ - $V$  curves of different contacts.

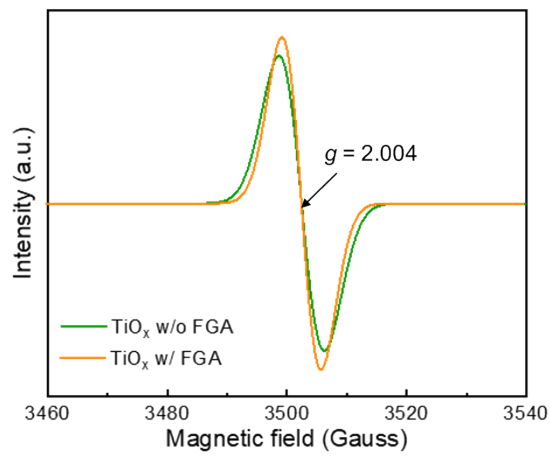

Fig. S11. Electron paramagnetic resonance (EPR) of the ultrathin  $\text{TiO}_x$  film with and without FGA treatment.

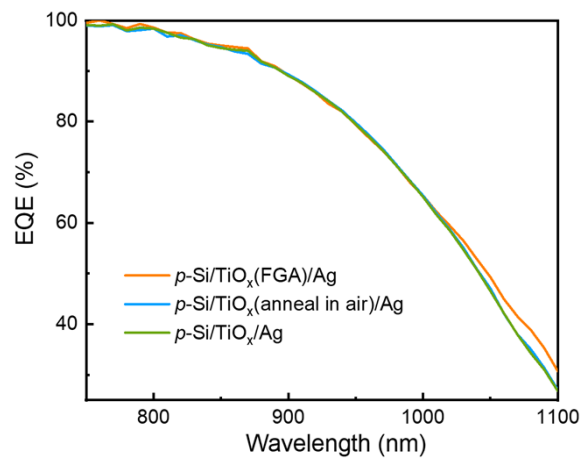

Fig. S12. EQE curves of solar cells with different  $\text{TiO}_x$ -based rear contacts.

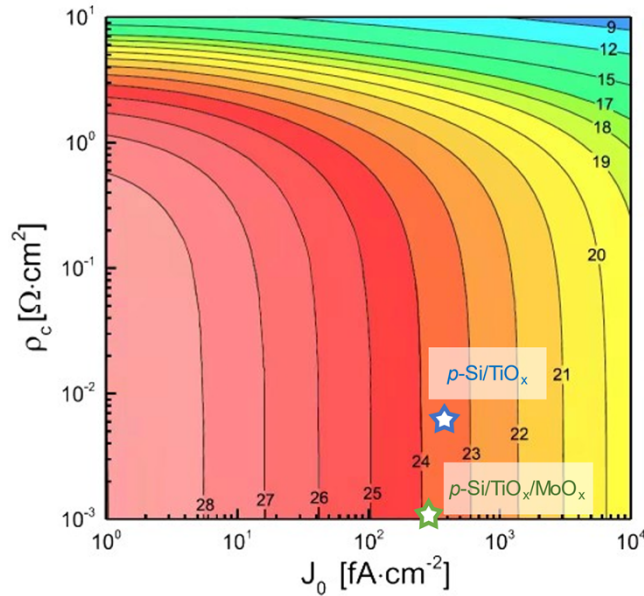

Fig. S13. Contour plot of *c*-Si solar cells featuring a full-area contact with the highest obtainable *PCE* in dependence of  $J_0$  and  $\rho_c$  calculated from Quokka simulations. This figure has been adapted from reference [1]. The blue and green stars represent the  $J_0$  and  $\rho_c$  values reported for *p*-Si/TiO<sub>x</sub> and *p*-Si/TiO<sub>x</sub>/MoO<sub>x</sub> contacts in this work.

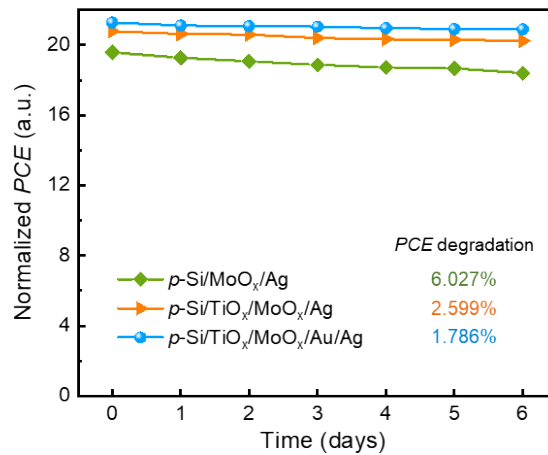

Fig. S14. Absolute *PCEs* of solar cells with different MoO<sub>x</sub>-based HSCs as a function of storage time.

## Reference

[1] Macco B, Black LE, Melskens J, et al. Atomic-layer deposited Nb2O5 as transparent passivating electron contact for *c*-Si solar cells. *Sol. Energy Mater. Sol. Cells.* 2018, 184, 98-104. doi: 10.1016/j.solmat.2018.04.037
